# Supplementary material for: The impact of price and tobacco control policies on the demand for electronic nicotine delivery systems
Source: PubMed Central journal article supplement — Tob Control. 2014 Apr 24;23(Suppl 3):iii41–7. doi: 10.1136/tobaccocontrol-2013-051515 (PMC4145658; doi:10.1136/tobaccocontrol-2013-051515), 2014-04-24
Supplement: tobaccocontrol-2013-051515-s1.pdf [file tobaccocontrol-2013-051515-s1.pdf]

## Online Only Appendix Tables:

### Appendix 1. Summary Statistics for State Level Demographic and Socio-economic Variables in Analysis of Disposable E-cigarettes

| <b>Variables</b>                                                 | <b>mean</b> | <b>sd</b> | <b>min</b> | <b>max</b> |
|------------------------------------------------------------------|-------------|-----------|------------|------------|
| Market population                                                | 5547356     | 3838943   | 1090263    | 20628688   |
| Gender % of male population *                                    | 49.09       | 0.51      | 48.17      | 50.48      |
| Gender % of female population                                    | 50.91       | 0.51      | 49.52      | 51.83      |
| Employment: % of 16+ who are employed *                          | 58.99       | 3.13      | 52.10      | 66.41      |
| Employment: % of 16+ who are not employed                        | 41.01       | 3.13      | 33.59      | 47.90      |
| Age Group: % of population under 5 years                         | 6.61        | 0.67      | 5.18       | 9.16       |
| Age Group: % of population 5 to 17 years old                     | 17.70       | 1.06      | 15.18      | 21.28      |
| Age Group: % of population 18 to 24 years old *                  | 9.79        | 0.74      | 7.92       | 12.09      |
| Age Group: % of population 25 to 44 years old                    | 27.28       | 1.60      | 23.89      | 30.20      |
| Age Group: % of population 45 to 64 years old                    | 25.93       | 1.28      | 21.14      | 28.72      |
| Age Group: % of population 65 and over                           | 12.69       | 2.20      | 8.81       | 20.45      |
| Race: % of population who are white *                            | 75.40       | 9.53      | 54.88      | 90.87      |
| Race: % of population who are black                              | 13.16       | 8.05      | 0.88       | 34.94      |
| Race: % of population who are other race                         | 11.43       | 7.89      | 3.09       | 38.20      |
| Ethnicity: % of population who are non Hispanic *                | 86.76       | 11.77     | 46.36      | 98.87      |
| Ethnicity: % of population who are Hispanic                      | 13.24       | 11.77     | 1.13       | 53.64      |
| Education: % of 25+ population with less than high school *      | 14.03       | 3.15      | 8.26       | 24.43      |
| Education: % of 25+ population with high school and some college | 57.50       | 4.59      | 47.75      | 64.73      |
| Education: % of 25+ population with bachelor's or more           | 28.47       | 4.64      | 19.41      | 40.39      |
| Income: % of households with income 0 - 25,000 *                 | 22.99       | 3.60      | 13.74      | 32.54      |
| Income: % of households with income 25,000 - 50,000              | 24.75       | 2.65      | 18.25      | 28.73      |
| Income: % of households with income 50,000 - 100,000             | 31.31       | 1.68      | 27.05      | 35.60      |
| Income: % of households with income 100,000 - 150,000            | 12.51       | 2.33      | 7.90       | 18.27      |
| Income: % of households with income 150,000 or more              | 8.44        | 3.25      | 4.09       | 18.26      |
| N                                                                | 569         |           |            |            |

\* Reference Category

**Appendix 2. Summary Statistics for State Level Demographic and Socio-economic Variables in Analysis of Reusable E-cigarettes**

| <b>Variables</b>                                                 | <b>mean</b> | <b>sd</b> | <b>min</b> | <b>max</b> |
|------------------------------------------------------------------|-------------|-----------|------------|------------|
| Market population                                                | 5991489     | 4070396   | 1105923    | 20628688   |
| Gender % of male population *                                    | 49.07       | 0.52      | 48.17      | 50.48      |
| Gender % of female population                                    | 50.93       | 0.52      | 49.52      | 51.83      |
| Employment: % of 16+ who are employed *                          | 58.77       | 3.06      | 52.10      | 66.41      |
| Employment: % of 16+ who are not employed                        | 41.23       | 3.06      | 33.59      | 47.90      |
| Age Group: % of population under 5 years                         | 6.63        | 0.64      | 5.18       | 9.16       |
| Age Group: % of population 5 to 17 years old                     | 17.72       | 1.08      | 15.18      | 21.28      |
| Age Group: % of population 18 to 24 years old *                  | 9.76        | 0.73      | 7.92       | 11.81      |
| Age Group: % of population 25 to 44 years old                    | 27.42       | 1.61      | 23.89      | 30.20      |
| Age Group: % of population 45 to 64 years old                    | 25.85       | 1.24      | 21.14      | 28.72      |
| Age Group: % of population 65 and over                           | 12.62       | 2.28      | 8.81       | 20.45      |
| Race: % of population who are white *                            | 74.25       | 9.57      | 54.88      | 90.87      |
| Race: % of population who are black                              | 13.72       | 8.09      | 0.88       | 34.94      |
| Race: % of population who are other race                         | 12.03       | 8.41      | 3.09       | 38.20      |
| Ethnicity: % of population who are non Hispanic *                | 85.83       | 12.36     | 46.36      | 98.87      |
| Ethnicity: % of population who are Hispanic                      | 14.17       | 12.36     | 1.13       | 53.64      |
| Education: % of 25+ population with less than high school *      | 14.42       | 3.16      | 8.26       | 24.43      |
| Education: % of 25+ population with high school and some college | 57.07       | 4.75      | 47.75      | 64.73      |
| Education: % of 25+ population with bachelor's or more           | 28.51       | 4.81      | 19.41      | 40.39      |
| Income: % of households with income 0 - 2,000 *                  | 23.00       | 3.66      | 13.74      | 32.54      |
| Income: % of households with income 25,000 - 50,000              | 24.67       | 2.74      | 18.25      | 28.73      |
| Income: % of households with income 50,000 - 100,000             | 31.14       | 1.62      | 27.05      | 35.60      |
| Income: % of households with income 100,000 - 150,000            | 12.54       | 2.39      | 7.90       | 18.27      |
| Income: % of households with income 150,000 or more              | 8.66        | 3.37      | 4.09       | 18.26      |

N

474

\* Reference Category

**Appendix 3. Analysis of Disposable and Reusable E-cigarettes (Market-Store Fixed Effects Models Controlling for Market-level Socioeconomic and Demographic Characteristics)**

| VARIABLES              | Disposable E-Cigarettes |           |           |           |           | Reusable E-Cigarettes |           |           |           |           |
|------------------------|-------------------------|-----------|-----------|-----------|-----------|-----------------------|-----------|-----------|-----------|-----------|
|                        | (1)                     | (2)       | (3)       | (4)       | (5)       | (6)                   | (7)       | (8)       | (9)       | (10)      |
| Own Price Elasticity   | -1.096*                 | -1.171**  | -1.162**  | -1.175**  | -2.135**  | -1.858***             | -1.851*** | -1.829*** | -1.871*** | -2.019*** |
|                        | (0.577)                 | (0.511)   | (0.508)   | (0.512)   | (0.912)   | (0.530)               | (0.538)   | (0.536)   | (0.526)   | (0.500)   |
| SFA index              |                         | -2.963**  | -2.925**  | -3.002**  | 2.002     |                       | 3.311     | 3.927     | 3.039     | 3.291     |
|                        |                         | (1.310)   | (1.391)   | (1.224)   | (6.513)   |                       | (6.256)   | (5.899)   | (6.262)   | (6.649)   |
| Ln Tax Cigarette       |                         |           | -0.302    |           |           |                       |           | -2.501    |           |           |
|                        |                         |           | (2.357)   |           |           |                       |           | (1.590)   |           |           |
| Ln Price Cigarette     |                         |           |           | 0.562     | 0.967     |                       |           |           | 3.274     | 0.648     |
|                        |                         |           |           | (3.837)   | (3.622)   |                       |           |           | (4.365)   | (3.503)   |
| Cross Price Elasticity |                         |           |           |           | 0.535     |                       |           |           |           | 1.217     |
|                        |                         |           |           |           | (0.329)   |                       |           |           |           | (0.899)   |
| year==2009             | -0.388                  | -1.968*   | -2.012*   | -1.952*   |           |                       |           |           |           |           |
|                        | (1.115)                 | (1.005)   | (1.020)   | (1.035)   |           |                       |           |           |           |           |
| year==2010             | -3.898***               | -3.987*** | -4.002*** | -4.009*** | -4.098*** | -2.387***             | -2.315*** | -2.418*** | -2.427*** | -2.629*** |
|                        | (0.376)                 | (0.372)   | (0.390)   | (0.406)   | (0.523)   | (0.357)               | (0.347)   | (0.369)   | (0.373)   | (0.593)   |
| year==2011             | -1.589***               | -1.613*** | -1.622*** | -1.618*** | -1.629*** | -0.850***             | -0.818*** | -0.878*** | -0.845*** | -0.886*** |
|                        | (0.218)                 | (0.217)   | (0.217)   | (0.229)   | (0.224)   | (0.277)               | (0.270)   | (0.278)   | (0.279)   | (0.291)   |
| quarter==2             | -0.118                  | -0.0925   | -0.0928   | -0.0848   | 0.145     | 0.0309                | 0.0287    | 0.0309    | 0.0718    | 0.0576    |
|                        | (0.132)                 | (0.127)   | (0.127)   | (0.144)   | (0.116)   | (0.115)               | (0.114)   | (0.115)   | (0.0968)  | (0.0929)  |
| quarter==3             | 0.0223                  | 0.0703    | 0.0705    | 0.0736    | 0.103     | -0.0649               | -0.0805   | -0.0755   | -0.0652   | -0.0640   |
|                        | (0.131)                 | (0.136)   | (0.137)   | (0.139)   | (0.137)   | (0.118)               | (0.122)   | (0.124)   | (0.117)   | (0.119)   |
| quarter==4             | 0.473***                | 0.516***  | 0.517***  | 0.520***  | 0.489***  | 0.476***              | 0.456***  | 0.458***  | 0.474***  | 0.473***  |
|                        | (0.149)                 | (0.145)   | (0.145)   | (0.148)   | (0.121)   | (0.118)               | (0.121)   | (0.125)   | (0.113)   | (0.134)   |
| Constant               | 207.1***                | 250.0***  | -96.78    | 249.6***  | -254.3*** | 375.9***              | 310.3***  | 135.4     | 330.8***  | -62.72    |
|                        | (3.459)                 | (17.58)   | (187.9)   | (41.40)   | (58.37)   | (29.42)               | (117.2)   | (170.1)   | (117.2)   | (64.36)   |
| Observations           | 569                     | 569       | 569       | 569       | 459       | 474                   | 474       | 474       | 474       | 459       |
| R-squared              | 0.802                   | 0.806     | 0.806     | 0.806     | 0.836     | 0.773                 | 0.775     | 0.777     | 0.775     | 0.776     |

Note: Year 2012 and 1st Quarter are reference groups. Market-store level dummies are not shown in the table.
